# Supplementary material for: "Exploring the Relationship Between Depression and the Five-Factor Personality Model: A Comparative Study Using Three Decision Tree Algorithms"
Source: Research Square preprint supplement (doi:10.21203/rs.3.rs-7722213/v1), 2025-11-23
Supplement: Supplementary file 1 [file 7d681468435a550e51bb2280.docx]

**Demographic Questionnaire** *Designed for the study: Depression and Personality Traits among University Students*

**Participant Information and Instructions**

Thank you for taking the time to participate in this study. Your responses are highly valuable and will contribute to a better understanding of depression and personality traits among university students.

Please answer the following questions honestly and to the best of your knowledge. All information provided will remain strictly confidential and will be used for research purposes only. Participation is entirely voluntary, and you may choose to skip any question or withdraw at any time without penalty.

If you have any questions or concerns regarding this questionnaire, please contact the research team.

| **Item** | **Question** | **Response Options** |
| --- | --- | --- |
| 1 | Age | _____ years |
| 2 | Gender | ☐ Male ☐ Female ☐ Other: ______ |
| 3 | Marital Status | ☐ Single ☐ Married ☐ Divorced ☐ Widowed |
| 4 | Ethnicity | __________________________ |
| 5 | Field of Study | __________________________ |
| 6 | Academic Semester | ☐ First ☐ Second ☐ Third ☐ Fourth or above |
| 7 | Family Size | _____ persons |
| 8 | Employment Status | ☐ Unemployed ☐ Part-time ☐ Full-time |
| 9 | Residency | ☐ With family ☐ Dormitory ☐ Rented apartment ☐ Other: ______ |
| 10 | Father's Education | ☐ Illiterate ☐ Primary ☐ Secondary ☐ University |
| 11 | Mother's Education | ☐ Illiterate ☐ Primary ☐ Secondary ☐ University |
| 12 | Father's Occupation | __________________________ |
| 13 | Mother's Occupation | __________________________ |
| 14 | Monthly Family Income | ☐ <5 million IRR ☐ 5–10 million IRR ☐ >10 million IRR |
| 15 | Home Ownership | ☐ Yes ☐ No |
| 16 | Car Ownership | ☐ Yes ☐ No |
| 17 | Insurance Coverage | ☐ Yes ☐ No |
| 18 | History of Travel Abroad | ☐ Yes ☐ No |
